# Supplementary material for: Diversity of Species and Behavior of Hymenopteran Parasitoids of Ants: A Review
Source: Hindawi journal article supplement (doi:10.1155/2012/134746), 2012-01-01
Supplement: f1 [file 134746.f1.pdf]

Supplementary Material 1. Ant species (primary hosts) and their wasp parasitoids. Species names are listed in alphabetical order.

| ANT SPECIES                             | WASP SPECIES                                     | WASP FAMILY  | REFERENCES |
|-----------------------------------------|--------------------------------------------------|--------------|------------|
| <i>Acromyrmex ambiguus</i> (Emery)      | <i>Szelenyiopria lucens</i> (Loiácono)           | Diapriidae   | [37]       |
| <i>Acromyrmex lobicornis</i> (Emery)    | <i>Szelenyiopria pampeana</i> (Loiácono)         | Diapriidae   | [38]       |
|                                         | <i>Trichopria formicans</i> Loiácono             | Diapriidae   | [39]       |
|                                         | <i>Trichopria</i> sp.                            | Diapriidae   | [39]       |
| <i>Anoplolepis</i> sp.                  | <i>Athairocharis vannoorti</i> Heraty            | Eucharitidae | [11]       |
| <i>Azteca alfari</i> Emery              | <i>Aximopsis affinis</i> (Brues)                 | Eurytomidae  | [115]      |
|                                         | <i>Aximopsis aztecicida</i> (Brues)              | Eurytomidae  | [114]      |
|                                         | <i>Aximopsis</i> sp. ( <i>aztecicida</i> ?)      | Eurytomidae  | [117]      |
| <i>Azteca australis</i> Wheeler         | <i>Aximopsis</i> sp. ( <i>aztecicida</i> ?)      | Eurytomidae  | [117]      |
| <i>Azteca constructor</i> Emery         | <i>Aximopsis aztecicida</i> (Brues)              | Eurytomidae  | [114]      |
| <i>Azteca ovaticeps</i> Forel           | <i>Aximopsis</i> sp. ( <i>aztecicida</i> ?)      | Eurytomidae  | [118]      |
| <i>Azteca pittieri</i> Forel            | <i>Aximopsis affinis</i> (Brues)                 | Eurytomidae  | [116]      |
| <i>Azteca salti</i> Wheeler             | <i>Aximopsis</i> sp.                             | Eurytomidae  | [115]      |
| <i>Azteca</i> sp.                       | <i>Aximopsis affinis</i> (Brues)                 | Eurytomidae  | [114]      |
| <i>Calomyrmex purpureus</i> (Mayr)      | <i>Stilbuloida calomyrmecis</i> (Brues)          | Eucharitidae | [102]      |
| <i>Camponotus aethiops</i> (Latr.)      | <i>Stilbula cyniformis</i> (Rossi)               | Eucharitidae | [67]       |
| <i>Camponotus atriceps</i> (F. Smith)   | <i>Horismenus floridensis</i> (Schauff & Bouček) | Eulophidae   | [110]      |
| <i>Camponotus balzani</i> Emery         | <i>Aximopsis</i> sp. ( <i>aztecicida</i> ?)      | Eurytomidae  | [117]      |
| <i>Camponotus castaneus</i> (Latr.)     | <i>Elasmosoma pergandei</i> Ashmead *            | Braconidae   | [131]      |
| <i>Camponotus floridanus</i> (Buckley)  | <i>Horismenus floridensis</i> (Schauff & Bouček) | Eulophidae   | [110]      |
|                                         | <i>Obeza floridana</i> (Ashmead)                 | Eucharitidae | [83]       |
| <i>Camponotus herculeanus</i> (L.)      | <i>Pseudochalcura gibbosa</i> (Provancher)       | Eucharitidae | [45]       |
| <i>Camponotus japonicus</i> Mayr        | <i>Stilbula cyniformis</i> (Rossi)               | Eucharitidae | [107]      |
| <i>Camponotus laevigatus</i> (F. Smith) | <i>Pseudochalcura gibbosa</i> (Provancher)       | Eucharitidae | [103]      |

|                                               |                                                                   |              |            |
|-----------------------------------------------|-------------------------------------------------------------------|--------------|------------|
| <i>Camponotus maculatus</i> (Fabr.)           | <i>Hydrorhoa</i> sp. <i>striaticeps</i> Kieffer complex           | Eucharitidae | [11]       |
| <i>Camponotus novaeboracensis</i> (Fitch)     | <i>Pseudochalcura gibbosa</i> (Provancher)                        | Eucharitidae | [69]       |
| <i>Camponotus obscuripes</i> Mayr             | <i>Stilbula cyniformis</i> (Rossi)                                | Eucharitidae | [65, 107]  |
| <i>Camponotus planatus</i> Roger              | <i>Pseudochalcura sculpturata</i> Heraty                          | Eucharitidae | [11]       |
| <i>Camponotus sanctus</i> Forel               | <i>Stilbula cyniformis</i> (Rossi)                                | Eucharitidae | [61]       |
| <i>Camponotus vagus</i> (Scopoli)             | <i>Elasmosoma berolinense</i> Ruthe                               | Braconidae   | [120]      |
| <i>Camponotus</i> sp.                         | <i>Lophyrocera variabilis</i> Torr  ns, Heraty & Fidalgo          | Eucharitidae | [81]       |
|                                               | <i>Mateucharis rugulosa</i> Heraty                                | Eucharitidae | [11]       |
|                                               | <i>Pseudochalcura nigrocyanea</i> Ashmead                         | Eucharitidae | [104]      |
|                                               | <i>Stilbuloida doddi</i> (Bingham)                                | Eucharitidae | [51]       |
|                                               | <i>Zulucharis campbelli</i> Heraty                                | Eucharitidae | [11]       |
| <i>Camponotus</i> sp. ***                     | <i>Ancylotropus manipurensis</i>                                  | Eucharitidae | [11, 45]   |
| <i>Camponotus</i> spp.                        | <i>Elasmosoma berolinense</i> Ruthe                               | Braconidae   | [119]      |
| <i>Camponotus</i> sp. ca. <i>textor</i> Forel | <i>Horismenus myrmecophagus</i> Hansson, Lachaud & P  rez-Lachaud | Eulophidae   | [111]      |
| <i>Camponotus</i> sp. ? <i>vicinus</i> Mayr   | <i>Pseudochalcura gibbosa</i> (Provancher)                        | Eucharitidae | [103]      |
| <i>Camponotus</i> ( <i>Tanaemyrmex</i> ) sp.  | <i>Rhipipalloidea madangensis</i> Maeyama, Machida & Terayama     | Eucharitidae | [106]      |
| <i>Cataglyphis bicolor</i> (Fabr.)            | <i>Kollasmosoma platamonense</i> (Huddleston)                     | Braconidae   | [126]      |
| <i>Cataglyphis bicolor</i> (Fabr.) ***        | <i>Eucharis bedeli</i> (Cameron)                                  | Eucharitidae | [62]       |
| <i>Cataglyphis ibericus</i> (Emery)           | <i>Kollasmosoma sentum</i> van Achterberg & G  mez                | Braconidae   | [128]      |
| <i>Cataglyphis nodus</i> (Brull  )            | <i>Eucharis microcephala</i> Bou  ek                              | Eucharitidae | [66]       |
| <i>Cataglyphis viaticus</i> (Fabr.)           | <i>Eucharis bedeli</i> (Cameron)                                  | Eucharitidae | [63, 64]   |
| <i>Cataglyphis</i> sp. **                     | <i>Eucharis rugulosa</i> Gussakovskiy                             | Eucharitidae | [59]       |
| <i>Crematogaster acuta</i> (Fabr.)            | Unidentified sp. ( <i>Horismenus</i> ?)                           | Eulophidae   | [108, 111] |
| <i>Crematogaster</i> sp.                      | <i>Myrmokata diparoides</i> Bou  ek                               | Eulophidae   | [112]      |
| <i>Cyphomyrmex minutus</i> Mayr               | <i>Acanthopria</i> sp. 1                                          | Diapriidae   | [35]       |
| <i>Cyphomyrmex rimosus</i> (Spinola)          | <i>Acanthopria</i> sp. #1'                                        | Diapriidae   | [35]       |
|                                               | <i>Acanthopria</i> sp. #2'                                        | Diapriidae   | [35]       |
|                                               | <i>Acanthopria</i> sp. #3'                                        | Diapriidae   | [35]       |

|                                            |                                                  |              |          |
|--------------------------------------------|--------------------------------------------------|--------------|----------|
|                                            | <i>Acanthopria</i> sp. #4'                       | Diapriidae   | [35]     |
|                                            | <i>Mimopriella</i> sp.                           | Diapriidae   | [35]     |
| <i>Cyphomyrmex salvini</i> Forel           | <i>Acanthopria</i> sp.                           | Diapriidae   | [32]     |
| <i>Cyphomyrmex transversus</i> Emery       | <i>Acanthopria</i> sp. #1                        | Diapriidae   | [34]     |
|                                            | <i>Acanthopria</i> sp. #2                        | Diapriidae   | [34]     |
|                                            | <i>Acanthopria</i> sp. #3                        | Diapriidae   | [34]     |
|                                            | <i>Acanthopria</i> sp. #4                        | Diapriidae   | [34]     |
|                                            | <i>Acanthopria</i> sp. #5                        | Diapriidae   | [34]     |
|                                            | <i>Acanthopria</i> sp. #6                        | Diapriidae   | [34]     |
|                                            | <i>Acanthopria</i> sp. #7                        | Diapriidae   | [34]     |
|                                            | <i>Acanthopria</i> sp. #8                        | Diapriidae   | [34]     |
| <i>Dinoponera lucida</i> Emery             | <i>Kapala</i> sp.                                | Eucharitidae | [76]     |
| <i>Diplorhoptrum validiusculum</i> (Emery) | <i>Orasema coloradensis</i> Wheeler              | Eucharitidae | [69]     |
| <i>Eciton quadriglume</i> (Haliday) **     | <i>Orasema rapo</i> (Walker)                     | Eucharitidae | [82]     |
| <i>Ectatomma brunneum</i> F. Smith         | <i>Dicoelothorax platycerus</i> Ashmead          | Eucharitidae | [56]     |
|                                            | <i>Kapala</i> sp.                                | Eucharitidae | [77]     |
| <i>Ectatomma ruidum</i> Roger              | <i>Kapala iridicolor</i> (Cameron)               | Eucharitidae | [74, 75] |
|                                            | <i>Kapala izapa</i> Carmichael                   | Eucharitidae | [75]     |
| <i>Ectatomma ruidum</i> Roger ***          | <i>Isomerala coronata</i> (Westwood)             | Eucharitidae | [11]     |
| <i>Ectatomma tuberculatum</i> (Olivier)    | <i>Dilocantha lachaudii</i> Heraty               | Eucharitidae | [57, 58] |
|                                            | <i>Isomerala coronata</i> (Westwood)             | Eucharitidae | [72]     |
|                                            | <i>Kapala</i> sp.                                | Eucharitidae | [78]     |
| <i>Formica cunicularia</i> Latr.           | <i>Neoneurus vesculus</i> van Achterberg & Gómez | Braconidae   | [128]    |
| <i>Formica ?cunicularia</i> Latr. **       | <i>Eucharis adscendens</i> (Fabr.)               | Eucharitidae | [59]     |
| <i>Formica fusca</i> L.                    | <i>Elasmosoma berolinense</i> Ruthe              | Braconidae   | [47]     |
| <i>Formica integra</i> Nylander            | <i>Elasmosoma pergandei</i> Ashmead *            | Braconidae   | [125]    |
|                                            | <i>Elasmosoma petulans</i> Muesebeck *           | Braconidae   | [132]    |
| <i>Formica japonica</i> Motschoulski       | <i>Elasmosoma berolinense</i> Ruthe              | Braconidae   | [121]    |

|                                                |                                          |               |                 |
|------------------------------------------------|------------------------------------------|---------------|-----------------|
|                                                | <i>Eucharis esakii</i> Ishii             | Eucharitidae  | [65]            |
| <i>Formica neorufibarbis</i> Emery **          | <i>Eucharis</i> sp.                      | Eucharitidae  | [69]            |
| <i>Formica obscuripes</i> Forel                | <i>Elasmosoma michaeli</i> Shaw          | Braconidae    | [129]           |
| <i>Formica obscuriventris clivia</i> Creighton | <i>Elasmosoma michaeli</i> Shaw          | Braconidae    | [130]           |
| <i>Formica opaciventris</i> Emery              | <i>Elasmosoma petulans</i> Muesebeck *   | Braconidae    | [126, 132, 133] |
| <i>Formica oreas comptula</i> Wheeler          | <i>Orasema coloradensis</i> Wheeler      | Eucharitidae  | [87]            |
| <i>Formica pergandei</i> Emery                 | <i>Elasmosoma petulans</i> Muesebeck *   | Braconidae    | [132, 133]      |
| <i>Formica perpilosa</i> Wheeler               | <i>Elasmosoma vigilans</i> Cockerell     | Braconidae    | [93]            |
| <i>Formica podzolica</i> Francoeur             | <i>Neoneurus mantis</i> Shaw             | Braconidae    | [141, 142]      |
| <i>Formica pratensis</i> Retzius               | <i>Elasmosoma berolinense</i> Ruthe      | Braconidae    | [122]           |
|                                                | <i>Kollasmosoma marikovskii</i> (Tobias) | Braconidae    | [136]           |
|                                                | <i>Neoneurus auctus</i> (Thomson)        | Braconidae    | [138, 139]      |
| <i>Formica rubicunda</i> Emery ***             | <i>Elasmosoma petulans</i> Muesebeck *   | Braconidae    | [126, 132, 133] |
| <i>Formica rufa</i> L.                         | <i>Chalcura</i> sp.                      | Eucharitidae  | [55]            |
|                                                | <i>Elasmosoma berolinense</i> Ruthe      | Braconidae    | [123–125]       |
|                                                | <i>Eucharis adscendens</i> (Fabr.)       | Eucharitidae  | [60]            |
|                                                | <i>Eurypterna cremieri</i> (de Romand)   | Ichneumonidae | [143]           |
|                                                | <i>Hybrizon buccatus</i> (Brébisson)     | Ichneumonidae | [151]           |
|                                                | <i>Neoneurus auctus</i> (Thomson)        | Braconidae    | [138, 139]      |
|                                                | <i>Neoneurus clypeatus</i> (Förster) *   | Braconidae    | [140]           |
| <i>Formica rufa</i> L. ***                     | <i>Eucharis bedeli</i> (Cameron)         | Eucharitidae  | [60, 64]        |
| <i>Formica rufibarbis</i> Fabr.                | <i>Elasmosoma luxemburgense</i> Wasmann  | Braconidae    | [127, 128]      |
|                                                | <i>Hybrizon buccatus</i> (Brébisson)     | Ichneumonidae | [151]           |
| <i>Formica sanguinea</i> Latr.                 | <i>Elasmosoma berolinense</i> Ruthe      | Braconidae    | [47]            |
|                                                | <i>Hybrizon buccatus</i> (Brébisson)     | Ichneumonidae | [151]           |
| <i>Formica schaufussi</i> Mayr                 | <i>Elasmosoma schwarzi</i> Ashmead *     | Braconidae    | [126]           |
| <i>Formica subintegra</i> Wheeler              | <i>Elasmosoma petulans</i> Muesebeck *   | Braconidae    | [132]           |
| <i>Formica subnitens</i> Creighton             | <i>Orasema coloradensis</i> Wheeler      | Eucharitidae  | [87]            |

|                                                    |                                                          |               |            |
|----------------------------------------------------|----------------------------------------------------------|---------------|------------|
| <i>Formica subpolita</i> Mayr                      | <i>Elasmosoma vigilans</i> Cockerell                     | Braconidae    | [134]      |
| <i>Formica subsericea</i> Say                      | <i>Elasmosoma pergandei</i> Ashmead *                    | Braconidae    | [125]      |
|                                                    | <i>Elasmosoma petulans</i> Muesebeck *                   | Braconidae    | [132]      |
| <i>Formica</i> sp.                                 | <i>Eucharis esakii</i> Ishii                             | Eucharitidae  | [54]       |
| <i>Formica</i> spp.                                | <i>Elasmosoma berolinense</i> Ruthe                      | Braconidae    | [119]      |
| <i>Gnamptogenys menadensis</i> (Mayr)              | <i>Pogonocharis browni</i> Heraty                        | Eucharitidae  | [11]       |
| <i>Gnamptogenys regularis</i> Mayr                 | <i>Kapala iridicolor</i> (Cameron)                       | Eucharitidae  | [75]       |
| <i>Gnamptogenys striatula</i> Mayr                 | <i>Kapala iridicolor</i> (Cameron)                       | Eucharitidae  | [75]       |
| <i>Gnamptogenys sulcata</i> (F. Smith)             | <i>Kapala iridicolor</i> (Cameron)                       | Eucharitidae  | [75]       |
|                                                    | <i>Kapala</i> sp.                                        | Eucharitidae  | [79]       |
| <i>Gnamptogenys tortuolosa</i> (F. Smith)          | <i>Kapala</i> sp.                                        | Eucharitidae  | [77]       |
| <i>Hypoponera nitidula</i> (Emery)                 | <i>Kapala</i> sp.                                        | Eucharitidae  | [80]       |
| <i>Hypoponera</i> sp.                              | <i>Neolosbanus gemma</i> (Girault)                       | Eucharitidae  | [82]       |
|                                                    | <i>Neolosbanus palgravei</i> (Girault)                   | Eucharitidae  | [82]       |
| <i>Lasius alienus</i> (Förster)                    | <i>Hybrizon buccatus</i> (Brébisson)                     | Ichneumonidae | [24]       |
|                                                    | <i>Hybrizon rileyi</i> (Ashmead) *                       | Ichneumonidae | [153]      |
| <i>Lasius brunneus</i> (Latr.)                     | <i>Hybrizon buccatus</i> (Brébisson)                     | Ichneumonidae | [143]      |
| <i>Lasius flavus</i> (Fabr.)                       | <i>Hybrizon buccatus</i> (Brébisson)                     | Ichneumonidae | [151]      |
| <i>Lasius fuliginosus</i> (Latr.)                  | <i>Eurypterna cremieri</i> (de Romand)                   | Ichneumonidae | [144–147]  |
|                                                    | <i>Ghilaromma fuliginosi</i> (Donisthorpe & Wilkinson) * | Ichneumonidae | [149, 150] |
| <i>Lasius grandis</i> Forel                        | <i>Hybrizon buccatus</i> (Brébisson)                     | Ichneumonidae | [128]      |
| <i>Lasius neoniger</i> Emery                       | <i>Pseudometagea schwarzii</i> (Ashmead)                 | Eucharitidae  | [105]      |
| <i>Lasius niger</i> (L.)                           | <i>Elasmosoma berolinense</i> Ruthe                      | Braconidae    | [47, 55]   |
|                                                    | <i>Eurypterna cremieri</i> (de Romand)                   | Ichneumonidae | [122]      |
|                                                    | <i>Hybrizon buccatus</i> (Brébisson)                     | Ichneumonidae | [139]      |
| <i>Lasius nipponensis</i> Forel                    | <i>Eurypterna cremieri</i> (de Romand)                   | Ichneumonidae | [148]      |
| <i>Lepisotia</i> sp.                               | <i>Pediobius marjoriae</i> Kerrich                       | Eulophidae    | [113]      |
| <i>Lasius</i> sp. ( <i>schiefferdeckeri</i> Mayr?) | <i>Elasmosomites primordialis</i> Brues                  | Braconidae    | [135]      |

|                                                |                                                 |               |          |
|------------------------------------------------|-------------------------------------------------|---------------|----------|
| <i>Messor barbarus</i> (L.) **                 | <i>Eucharis adscendens</i> (Fabr.)              | Eucharitidae  | [61]     |
| <i>Messor concolor</i> Santschi **             | <i>Eucharis punctata</i> Förster                | Eucharitidae  | [67]     |
| <i>Messor semirufus</i> (André)                | <i>Kollasmosoma platamonense</i> (Huddleston)   | Braconidae    | [137]    |
| <i>Messor structor</i> (Latr.) **              | <i>Eucharis shestakovi</i> Gussakovskiy         | Eucharitidae  | [68]     |
| <i>Monomorium</i> sp.                          | <i>Orasema monomoria</i> Heraty                 | Eucharitidae  | [92]     |
| <i>Myrmecia forficata</i> (Fabr.)              | <i>Austeucharis myrmeciae</i> (Forel)           | Eucharitidae  | [47]     |
| <i>Myrmecia gulosa</i> (Fabr.)                 | <i>Austeucharis fasciiventris</i> (Brues)       | Eucharitidae  | [46]     |
| <i>Myrmecia nigriceps</i> Mayr                 | <i>Austeucharis</i> sp.                         | Eucharitidae  | [48, 49] |
| <i>Myrmecia pavidula</i> Clark                 | <i>Austeucharis</i> sp.                         | Eucharitidae  | [48, 49] |
| <i>Myrmecia pilosula</i> F. Smith              | <i>Austeucharis implexa</i> (Walker)            | Eucharitidae  | [11]     |
|                                                | <i>Austeucharis</i> sp.                         | Eucharitidae  | [49]     |
| <i>Myrmecia pyriformis</i> F. Smith            | <i>Austeucharis</i> sp.                         | Eucharitidae  | [50]     |
| <i>Myrmecia tarsata</i> F. Smith               | <i>Austeucharis</i> sp.                         | Eucharitidae  | [49]     |
| <i>Myrmecia vindex</i> F. Smith                | <i>Austeucharis</i> sp.                         | Eucharitidae  | [49]     |
| <i>Myrmica incompleta</i> Provancher **        | <i>Eucharis</i> sp.                             | Eucharitidae  | [69]     |
| <i>Myrmica kotokui</i> Forel                   | Unidentified Hybrizontinae (gen. nov. sp. nov.) | Ichneumonidae | [148]    |
| <i>Myrmica lobicornis</i> Nylander             | <i>Hybrizon buccatus</i> (Brébisson)            | Ichneumonidae | [24]     |
| <i>Myrmica ruginodis</i> Nylander              | <i>Hybrizon buccatus</i> (Brébisson)            | Ichneumonidae | [24]     |
| <i>Myrmica scabrinodis</i> Nylander            | <i>Hybrizon buccatus</i> (Brébisson)            | Ichneumonidae | [152]    |
| <i>Odontomachus bauri</i> Emery                | <i>Kapala</i> sp.                               | Eucharitidae  | [11]     |
| <i>Odontomachus brunneus</i> (Patton)          | <i>Kapala</i> sp.                               | Eucharitidae  | [79]     |
| <i>Odontomachus haematodus</i> (L.)            | <i>Chalcura deprivata</i> (Walker)              | Eucharitidae  | [54]     |
|                                                | <i>Kapala</i> sp.                               | Eucharitidae  | [76]     |
|                                                | <i>Schizaspidia convergens</i> (Walker)         | Eucharitidae  | [54]     |
| <i>Odontomachus hastatus</i> (Fabr.)           | <i>Kapala</i> sp.                               | Eucharitidae  | [11]     |
| <i>Odontomachus insularis</i> Guérin-Méneville | <i>Kapala terminalis</i> Ashmead                | Eucharitidae  | [65]     |
|                                                | <i>Kapala</i> sp.                               | Eucharitidae  | [65]     |
| <i>Odontomachus laticeps</i> Roger             | <i>Kapala</i> sp.                               | Eucharitidae  | [79]     |

|                                          |                                                 |              |          |
|------------------------------------------|-------------------------------------------------|--------------|----------|
| <i>Odontomachus mayi</i> Mann            | <i>Kapala</i> sp.                               | Eucharitidae | [77]     |
| <i>Odontomachus meinerti</i> Forel       | <i>Kapala</i> sp.                               | Eucharitidae | [80]     |
| <i>Odontomachus opaciventris</i> Forel   | <i>Kapala</i> sp.                               | Eucharitidae | [79]     |
| <i>Odontomachus rixosus</i> F. Smith     | <i>Schizaspidia nasua</i> (Walker)              | Eucharitidae | [11]     |
| <i>Odontomachus ruficeps</i> F. Smith    | <i>Chalcura affinis</i> (Bingham)               | Eucharitidae | [51]     |
| <i>Odontomachus troglodytes</i> Santschi | <i>Ancylotropus</i> sp.                         | Eucharitidae | [11]     |
| <i>Odontomachus</i> sp.                  | <i>Chalcura affinis</i> (Bingham)               | Eucharitidae | [52, 53] |
| <i>Oecophylla smaragdina</i> (Fabr.)     | <i>Smicromorpha doddi</i> Girault               | Chalcididae  | [40, 41] |
|                                          | <i>Smicromorpha keralensis</i> Narendran *      | Chalcididae  | [42]     |
|                                          | <i>Smicromorpha masneri</i> Darling             | Chalcididae  | [43]     |
|                                          | <i>Smicromorpha minera</i> Girault *            | Chalcididae  | [41]     |
| <i>Pachycondyla apicalis</i> (Latr.)     | <i>Kapala</i> sp.                               | Eucharitidae | [79]     |
| <i>Pachycondyla crassinoda</i> (Latr.)   | <i>Kapala cuprea</i> Cameron                    | Eucharitidae | [73]     |
| <i>Pachycondyla goeldii</i> (Forel)      | <i>Blanchardiscus</i> sp. ? <i>pollux</i> Noyes | Encyrtidae   | [44]     |
| <i>Pachycondyla harpax</i> (Fabr.)       | <i>Kapala atrata</i> (Walker)                   | Eucharitidae | [11]     |
|                                          | <i>Kapala</i> sp.                               | Eucharitidae | [80]     |
| <i>Pachycondyla luteola</i> (Roger)      | Unidentified sp.                                | Perilampidae | [118]    |
| <i>Pachycondyla stigma</i> (Fabr.)       | <i>Kapala iridicolor</i> (Cameron)              | Eucharitidae | [75]     |
|                                          | <i>Kapala</i> sp.                               | Eucharitidae | [80]     |
| <i>Pachycondyla verenae</i> (Forel)      | <i>Kapala</i> sp.                               | Eucharitidae | [77]     |
| <i>Paratrechina</i> sp.                  | <i>Gollumiella longipetiolata</i> Hedqvist      | Eucharitidae | [71]     |
| <i>Pheidole bicarinata</i> Mayr          | <i>Orasema coloradensis</i> Wheeler             | Eucharitidae | [69]     |
| <i>Pheidole bilimeki</i> Mayr            | <i>Orasema</i> sp.                              | Eucharitidae | [98]     |
| <i>Pheidole capensis</i> Mayr            | <i>Timoderus acuminatus</i> Heraty              | Eucharitidae | [92]     |
| <i>Pheidole ceres</i> Wheeler            | <i>Orasema wheeleri</i> Wheeler                 | Eucharitidae | [69]     |
| <i>Pheidole dentata</i> Mayr             | <i>Orasema robertsoni</i> Gahan                 | Eucharitidae | [94]     |
|                                          | <i>Orasema wheeleri</i> Wheeler                 | Eucharitidae | [54, 69] |
|                                          | <i>Orasema</i> sp.                              | Eucharitidae | [82]     |

|                                               |                                                |              |          |
|-----------------------------------------------|------------------------------------------------|--------------|----------|
| <i>Pheidole desertorum</i> Wheeler            | <i>Orasema simulatrix</i> Gahan                | Eucharitidae | [97]     |
| <i>Pheidole flavens</i> Roger                 | <i>Orasema costaricensis</i> Wheeler & Wheeler | Eucharitidae | [62]     |
| <i>Pheidole hirtula</i> Forel                 | <i>Orasema tolteca</i> Mann                    | Eucharitidae | [99]     |
| <i>Pheidole megacephala</i> (Fabr.)           | <i>Orasema fraudulenta</i> (Reichensperger)    | Eucharitidae | [89]     |
| <i>Pheidole nitidula</i> Santschi             | <i>Orasema argentina</i> Gemignani             | Eucharitidae | [70]     |
| <i>Pheidole</i> nr. <i>californica</i> Mayr   | <i>Orasema</i> sp.                             | Eucharitidae | [82]     |
| <i>Pheidole</i> nr. <i>clementensis</i> Gregg | <i>Orasema</i> sp.                             | Eucharitidae | [82]     |
| <i>Pheidole</i> nr. <i>tetra</i> Creighton    | <i>Orasema minuta</i> Ashmead                  | Eucharitidae | [11, 82] |
|                                               | <i>Orasema susanae</i> Gemignani               | Eucharitidae | [82]     |
| <i>Pheidole paiute</i> Gregg                  | <i>Orasema</i> sp.                             | Eucharitidae | [93]     |
| <i>Pheidole pilifera</i> (Roger)              | <i>Orasema occidentalis</i> Ashmead            | Eucharitidae | [93]     |
| <i>Pheidole proxima</i> Mayr                  | <i>Orasemorpha tridentata</i> (Girault)        | Eucharitidae | [102]    |
| <i>Pheidole radoszkowskii</i> Mayr            | <i>Orasema worcesteri</i> (Girault)            | Eucharitidae | [70, 95] |
| <i>Pheidole sciophila</i> Wheeler             | <i>Orasema wheeleri</i> Wheeler                | Eucharitidae | [54, 69] |
| <i>Pheidole tasmaniensis</i> Mayr             | <i>Orasemorpha xeniades</i> (Walker)           | Eucharitidae | [82]     |
| <i>Pheidole tepicana</i> Pergande             | <i>Orasema wheeleri</i> Wheeler                | Eucharitidae | [54, 69] |
| <i>Pheidole vallifica</i> Forel               | <i>Orasema costaricensis</i> Wheeler & Wheeler | Eucharitidae | [88]     |
| <i>Pheidole</i> sp.                           | <i>Orasema assectator</i> Kerrich              | Eucharitidae | [85, 86] |
|                                               | <i>Orasema valgius</i> (Walker)                | Eucharitidae | [52]     |
|                                               | <i>Orasema</i> sp.                             | Eucharitidae | [82]     |
|                                               | <i>Orasema</i> sp. nr. <i>bouceki</i> Heraty   | Eucharitidae | [82]     |
|                                               | <i>Orasema</i> sp. <i>uichancoi</i> -group     | Eucharitidae | [92]     |
|                                               | <i>Orasemorpha eribotes</i> (Walker)           | Eucharitidae | [53]     |
|                                               | <i>Orasemorpha myrmicae</i> (Girault)          | Eucharitidae | [82]     |
| <i>Plagiolepis pygmaea</i> (Latr.)            | <i>Plagiopria passerae</i> Huggert & Masner    | Diapriidae   | [36]     |
| <i>Pogonomyrmex badius</i> (Latr.) **         | <i>Kapala floridana</i> (Ashmead)              | Eucharitidae | [69]     |
| <i>Pogonomyrmex cunicularius</i> Mayr **      | <i>Galearia latreillei</i> (Guérin-Ménéville)  | Eucharitidae | [11, 70] |
| <i>Polyergus lucidus</i> Mayr                 | <i>Elasmosoma schwarzi</i> Ashmead *           | Braconidae   | [126]    |



|                                           |                                                     |              |          |
|-------------------------------------------|-----------------------------------------------------|--------------|----------|
| <i>Polyergus</i> sp.                      | <i>Elasmosoma berolinense</i> Ruthe                 | Braconidae   | [126]    |
| <i>Polyrhachis dives</i> F. Smith         | <i>Stilbula polyrhachicida</i> (Wheeler & Wheeler)  | Eucharitidae | [108]    |
| <i>Polyrhachis femorata</i> F. Smith      | <i>Rhipipalloidea mira</i> Girault                  | Eucharitidae | [11]     |
| <i>Polyrhachis</i> sp.                    | <i>Stilbula arenae</i> Girault                      | Eucharitidae | [53]     |
| <i>Rhytidoponera chalybaea</i> Emery      | <i>Chalcura</i> sp. nr. <i>polita</i> (Girault)     | Eucharitidae | [11]     |
| <i>Rhytidoponera metallica</i> (F. Smith) | <i>Chalcura nigricyanea</i> (Girault)               | Eucharitidae | [11]     |
|                                           | <i>Chalcura polita</i> (Girault)                    | Eucharitidae | [11]     |
|                                           | <i>Tricoryna chalcoponerae</i> Brues                | Eucharitidae | [102]    |
|                                           | <i>Tricoryna minor</i> (Girault)                    | Eucharitidae | [11]     |
| <i>Rhytidoponera</i> sp.                  | <i>Tricoryna ectatommae</i> Girault                 | Eucharitidae | [109]    |
|                                           | <i>Tricoryna iello</i> (Walker)                     | Eucharitidae | [11]     |
| <i>Rhytidoponera victoriae</i> (André)    | <i>Tricoryna minor</i> (Girault)                    | Eucharitidae | [11]     |
| <i>Rhytidoponera violacea</i> (Forel)     | <i>Tricoryna</i> sp. nr. <i>alcicornis</i> (Bouček) | Eucharitidae | [11]     |
| <i>Solenopsis geminata</i> (Fabr.)        | <i>Orasema</i> sp.                                  | Eucharitidae | [82]     |
| <i>Solenopsis invicta</i> Buren           | <i>Orasema salebrosa</i> Heraty                     | Eucharitidae | [84]     |
|                                           | <i>Orasema simplex</i> Heraty                       | Eucharitidae | [96]     |
|                                           | <i>Orasema xanthopus</i> (Cameron)                  | Eucharitidae | [82, 95] |
| <i>Solenopsis macdonaghi</i> Santschi     | <i>Orasema simplex</i> Heraty                       | Eucharitidae | [84]     |
| <i>Solenopsis quinquecupis</i> Forel      | <i>Orasema aenea</i> Gahan                          | Eucharitidae | [84]     |
|                                           | <i>Orasema simplex</i> Heraty                       | Eucharitidae | [84]     |
|                                           | <i>Orasema xanthopus</i> (Cameron)                  | Eucharitidae | [84]     |
| <i>Solenopsis richteri</i> Forel          | <i>Orasema salebrosa</i> Heraty                     | Eucharitidae | [95]     |
|                                           | <i>Orasema simplex</i> Heraty                       | Eucharitidae | [95]     |
|                                           | <i>Orasema xanthopus</i> (Cameron)                  | Eucharitidae | [100]    |
| <i>Solenopsis saevissima</i> (F. Smith)   | <i>Orasema xanthopus</i> (Cameron)                  | Eucharitidae | [101]    |
| <i>Solenopsis tenuis</i> Mayr             | <i>Orasema sixaolae</i> Wheeler & Wheeler           | Eucharitidae | [62]     |
| <i>Solenopsis xyloni</i> MacCook          | <i>Orasema</i> sp.                                  | Eucharitidae | [82]     |
| <i>Solenopsis</i> sp.                     | <i>Orasema pireta</i> Heraty                        | Eucharitidae | [84]     |

|                                             |                                      |               |          |
|---------------------------------------------|--------------------------------------|---------------|----------|
| <i>Tapinoma erraticum</i> (Latr.)           | <i>Hybrizon buccatus</i> (Brébisson) | Ichneumonidae | [151]    |
| <i>Temnothorax allardycei</i> (Mann)        | <i>Orasema minuta</i> Ashmead        | Eucharitidae  | [11, 82] |
| <i>Tetramorium</i> sp.                      | <i>Orasema</i> sp.                   | Eucharitidae  | [82]     |
| <i>Trachymyrmex</i> cf. <i>zeteki</i> Weber | <i>Acanthopria</i> sp.               | Diapriidae    | [33]     |
|                                             | <i>Mimopriella</i> sp. 1             | Diapriidae    | [33]     |
|                                             | <i>Mimopriella</i> sp. 2             | Diapriidae    | [33]     |
|                                             | <i>Oxypria</i> sp.                   | Diapriidae    | [33]     |
|                                             | <i>Szelenyiopria</i> sp. 1           | Diapriidae    | [33]     |
|                                             | <i>Szelenyiopria</i> sp. 2           | Diapriidae    | [33]     |
| <i>Typhlomyrmex rogenhoferi</i> Mayr        | <i>Kapala</i> sp.                    | Eucharitidae  | [80]     |
| <i>Wasmannia auropunctata</i> (Roger)       | <i>Orasema minutissima</i> Howard    | Eucharitidae  | [90]     |
| <i>Wasmannia sigmoidea</i> (Mayr)           | <i>Orasema minutissima</i> Howard    | Eucharitidae  | [91]     |

\*: Attack not observed but there are strong evidences that all of the species of the wasp genus reported as associated with an ant host are true primary parasitoids of this host.

\*\*: Uncertain report of association (e.g. ants of the genera *Pogonomyrmex* and *Messor* do not have cocoons —contrary to what is reported in the original reference— and were probably misidentified), uncertain identification of the ant host (ambiguity between 2 or more species), or wasps not found directly within the nest of the presumed host (e.g. found near a nest —perhaps only by chance—, or found on refuse deposit —perhaps as a prey—).

\*\*\*: Erroneous report (misidentification of either the ant host or the parasitoid), or erroneous emendation of the ant host species.
